# Supplementary material for: Low Dietary Folate Increases Developmental Delays in the Litters of Mthfr677TT Mice
Source: MDPI journal article supplement (doi:10.3390/nu17152536), 2025-08-01
Supplement: s1 [file nutrients-3755135-supplementary.pdf › nutrients-3755135-supplementary.pdf]

**Table S1: Formulation of experimental diets <sup>1</sup>**

| Diet Composition (g/kg)                                 | 2D (TD.01369)<br>(2 mg/kg folic acid) | 1D (TD.240343)<br>(1 mg/kg folic acid) | 0.3D (TD.01546)<br>(0.3 mg/kg folic acid) |
|---------------------------------------------------------|---------------------------------------|----------------------------------------|-------------------------------------------|
| L-alanine                                               | 3.5                                   | 3.5                                    | 3.5                                       |
| L-arginine HCl                                          | 12.1                                  | 12.1                                   | 12.1                                      |
| L-asparagine                                            | 6.0                                   | 6.0                                    | 6.0                                       |
| L-aspartic acid                                         | 3.5                                   | 3.5                                    | 3.5                                       |
| L-cystine                                               | 3.5                                   | 3.5                                    | 3.5                                       |
| L-glutamic acid                                         | 40.0                                  | 40.0                                   | 40.0                                      |
| Glycine                                                 | 23.3                                  | 23.3                                   | 23.3                                      |
| L-histidine HCl, monohydrate                            | 4.5                                   | 4.5                                    | 4.5                                       |
| L-isoleucine                                            | 8.2                                   | 8.2                                    | 8.2                                       |
| L-leucine                                               | 11.1                                  | 11.1                                   | 11.1                                      |
| L-lysine HCl                                            | 18.0                                  | 18.0                                   | 18.0                                      |
| L-methionine                                            | 3.3                                   | 3.3                                    | 3.3                                       |
| L-phenylalanine                                         | 7.5                                   | 7.5                                    | 7.5                                       |
| L-proline                                               | 3.5                                   | 3.5                                    | 3.5                                       |
| L-serine                                                | 3.5                                   | 3.5                                    | 3.5                                       |
| L-threonine                                             | 8.2                                   | 8.2                                    | 8.2                                       |
| L-tryptophan                                            | 1.8                                   | 1.8                                    | 1.8                                       |
| L-tyrosine                                              | 5.0                                   | 5.0                                    | 5.0                                       |
| L-valine                                                | 8.2                                   | 8.2                                    | 8.2                                       |
| Sucrose                                                 | 359.28 <sup>2</sup>                   | 359.18                                 | 359.18                                    |
| Corn starch                                             | 150.0                                 | 150.0                                  | 150.0                                     |
| Maltodextrin                                            | 150.0                                 | 150.0                                  | 150.0                                     |
| Soybean oil                                             | 80.0                                  | 80.0                                   | 80.0                                      |
| Cellulose                                               | 30.0                                  | 30.0                                   | 30.0                                      |
| Mineral Mix, AIN-93M-MX                                 | 35.0                                  | 35.0                                   | 35.0                                      |
| Calcium phosphate, monobasic, monohydrate               | 8.2                                   | 8.2                                    | 8.2                                       |
| Succinylsulfathiazole                                   | 10.0                                  | 10.0                                   | 10.0                                      |
| Niacin                                                  | 0.03 <sup>3</sup>                     | 0.03                                   | 0.03                                      |
| Calcium pantothenate                                    | 0.016 <sup>3</sup>                    | 0.016                                  | 0.016                                     |
| Pyridoxine HCl                                          | 0.007 <sup>3</sup>                    | 0.007                                  | 0.007                                     |
| Thiamin HCl                                             | 0.006 <sup>3</sup>                    | 0.006                                  | 0.006                                     |
| Riboflavin                                              | 0.006 <sup>3</sup>                    | 0.006                                  | 0.006                                     |
| Folic acid                                              | 0.002 <sup>3</sup>                    | 0.001                                  | 0.0003                                    |
| Biotin                                                  | 0.0002 <sup>3</sup>                   | 0.0002                                 | 0.0002                                    |
| Vitamin B <sub>12</sub> (0.1% in mannitol)              | 0.025 <sup>3</sup>                    | 0.025                                  | 0.025                                     |
| Vitamin E, d,l- $\alpha$ -tocopheryl acetate (500 IU/g) | 0.15 <sup>3</sup>                     | 0.15                                   | 0.15                                      |
| Vitamin A palmitate (500,000 IU/g)                      | 0.008 <sup>3</sup>                    | 0.008                                  | 0.008                                     |
| Vitamin D <sub>3</sub> , cholecalciferol (500,000 IU/g) | 0.002 <sup>3</sup>                    | 0.002                                  | 0.002                                     |
| Vitamin K <sub>1</sub> , phyloquinone                   | 0.0008 <sup>3</sup>                   | 0.0008                                 | 0.0008                                    |
| Choline bitartrate                                      | 2.5                                   | 2.5                                    | 2.5                                       |
| Vitamin K, menadione sodium bisulfite                   | 0.05                                  | 0.05                                   | 0.05                                      |
| tert-Butylhydroquinone (TBHQ) antioxidant               | 0.02                                  | 0.02                                   | 0.02                                      |
| Green food color                                        | -                                     | -                                      | 0.1                                       |
| Orange food color                                       | -                                     | 0.1                                    | -                                         |

<sup>1</sup> Diet formulation is based on TD.99366 (a standard amino acid defined diet; Inotiv). Vitamin, mineral and choline content is based on recommendations for AIN-93 (Reeves PG. *J Nutr* 1997; 127:838S-41S); amino acid content is based on Rogers QR and Harper AE. *J Nutr* 1965; 87:267-73. Methionine content is lower than in Rogers and Harper; however, total methionine + cysteine content exceeds the minimum stated in the NRC guidelines (National Research Council. Nutrient Requirements of Laboratory Animals: 4th ed. Washington, DC: National Academies Press (US), 1995).

<sup>2</sup> Sucrose = 349.53 g/kg added sucrose + 9.75 g/kg from Vitamin Mix AIN-93-VX

<sup>3</sup> Obtained from 10 g/kg Vitamin Mix AIN-93-VX

**Table S2:** Effect of maternal genotype, diet, and embryonic genotype on the incidence of delays and defects

|         | Maternal Genotype | Diet | n litters | n affected litters | Embryo Genotype | n embryos | n affected embryos |
|---------|-------------------|------|-----------|--------------------|-----------------|-----------|--------------------|
| Delay   | mCC               | 2D   | 23        | 14                 | eCC             | 89        | 12                 |
|         |                   |      |           |                    | eCT             | 68        | 13                 |
|         |                   | 1D   | 22        | 17                 | eCC             | 70        | 13                 |
|         |                   |      |           |                    | eCT             | 80        | 21                 |
|         |                   | 0.3D | 19        | 14                 | eCC             | 44        | 10                 |
|         |                   |      |           |                    | eCT             | 63        | 15                 |
|         | mTT               | 2D   | 17        | 9                  | eCT             | 71        | 7                  |
|         |                   |      |           |                    | eTT             | 67        | 7                  |
|         |                   | 1D   | 20        | 15                 | eCT             | 71        | 14                 |
|         |                   |      |           |                    | eTT             | 65        | 16                 |
|         |                   | 0.3D | 21        | 15                 | eCT             | 75        | 13                 |
|         |                   |      |           |                    | eTT             | 72        | 17                 |
| Defects | mCC               | 2D   | 23        | 9                  | eCC             | 89        | 5                  |
|         |                   |      |           |                    | eCT             | 68        | 5                  |
|         |                   | 1D   | 22        | 11                 | eCC             | 70        | 8                  |
|         |                   |      |           |                    | eCT             | 80        | 9                  |
|         |                   | 0.3D | 19        | 7                  | eCC             | 44        | 5                  |
|         |                   |      |           |                    | eCT             | 63        | 6                  |
|         | mTT               | 2D   | 17        | 6                  | eCT             | 71        | 5                  |
|         |                   |      |           |                    | eTT             | 67        | 4                  |
|         |                   | 1D   | 20        | 9                  | eCT             | 71        | 7                  |
|         |                   |      |           |                    | eTT             | 65        | 7                  |
|         |                   | 0.3D | 21        | 12                 | eCT             | 75        | 6                  |
|         |                   |      |           |                    | eTT             | 72        | 11                 |

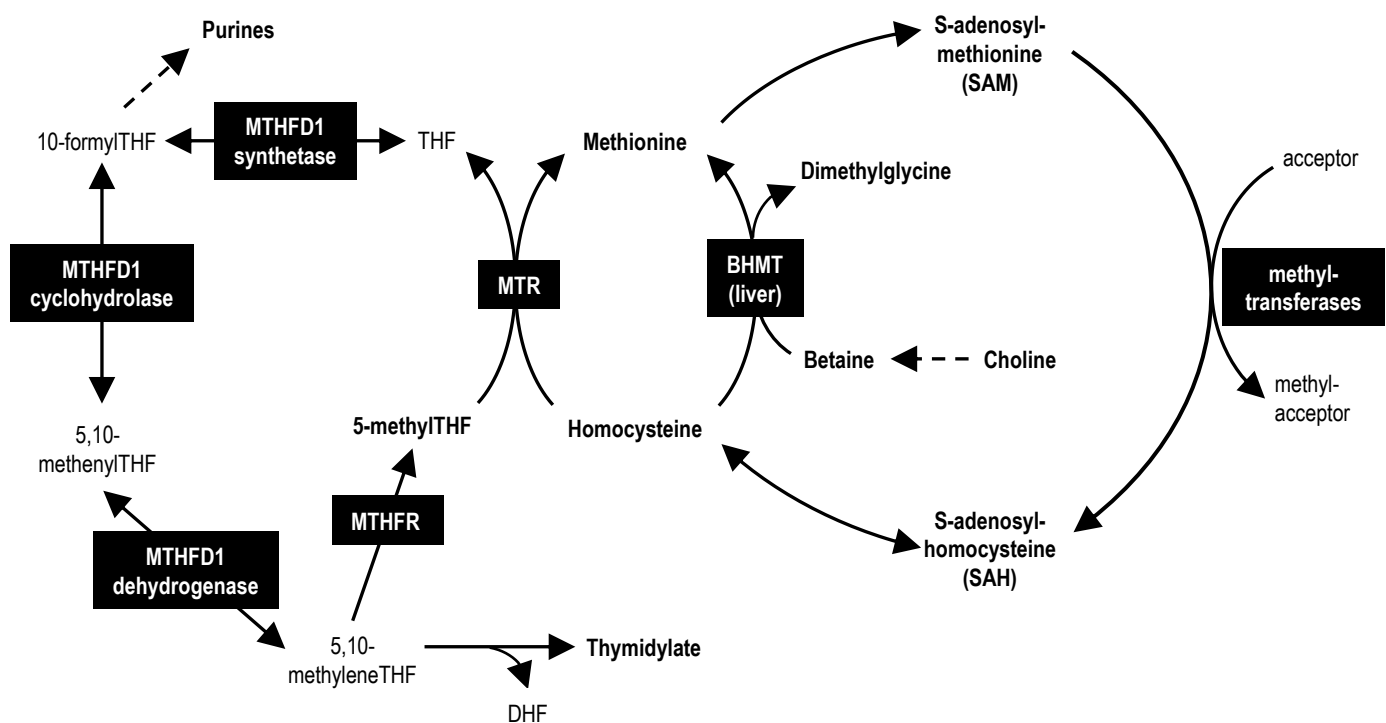

**Figure S1:** MTHFR and other key enzymes and metabolites in the one-carbon folate pathways. MTHFR produces 5-methylTHF from 5,10-methyleneTHF, committing folate to the methylation cycle. MethylTHF is used by MTR to remethylate homocysteine, producing methionine which can in turn be used to make S-adenosylmethionine, a feedback inhibitor of MTHFR. BHMT is expressed in liver and provides a folate-independent pathway for homocysteine remethylation using betaine as the one-carbon donor.

**Abbreviations:** BHMT, betaine-homocysteine methyltransferase; DHF, dihydrofolate; DMG, dimethylglycine; MTHFD1, methyleneTHF dehydrogenase-methenylTHF cyclohydrolase-10-formylTHF synthetase; MTR, methionine synthase; MTHFR, methyleneTHF reductase; PEMT, phosphatidylethanolamine N-methyltransferase; SAH, S-adenosylhomocysteine; SAM, S-adenosylmethionine; THF, tetrahydrofolate.

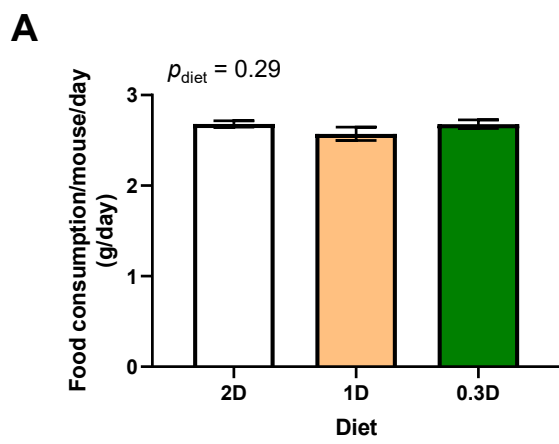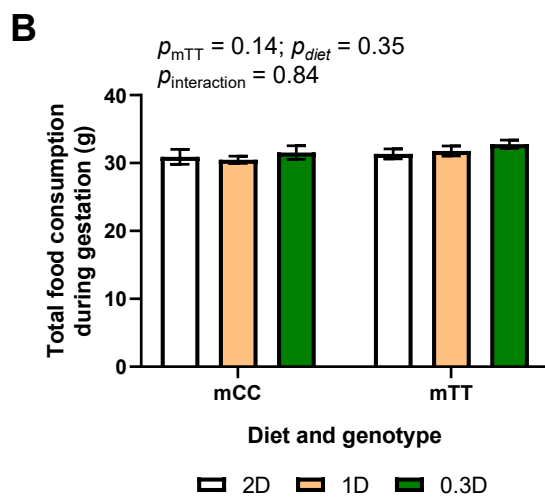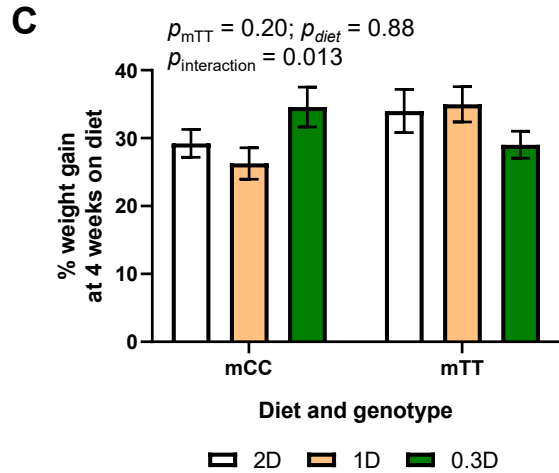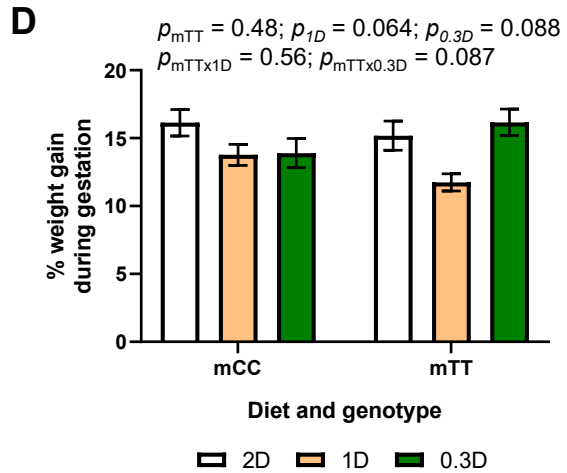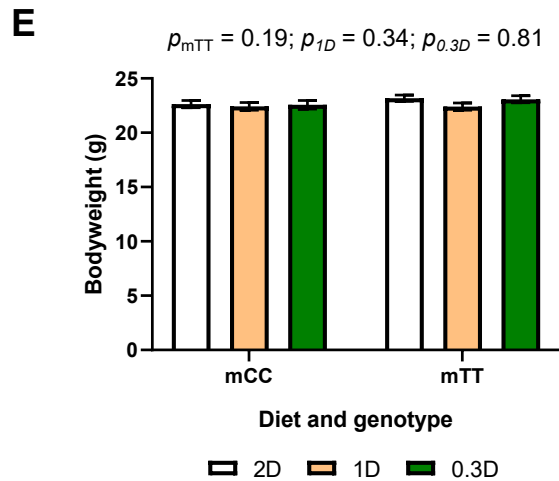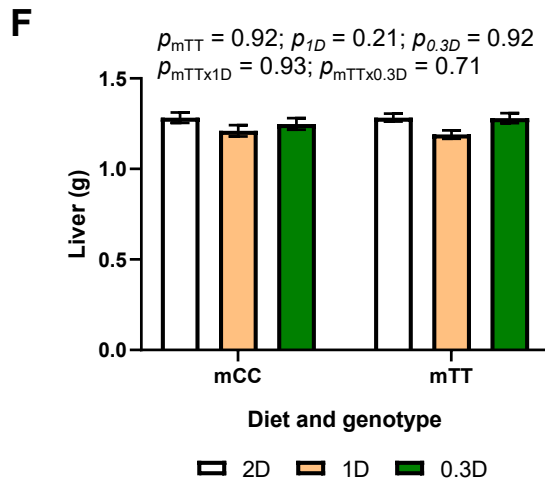

**Figure S2.** Food consumption, weight gain, body and liver weights in mice fed 2D, 1D and 0.3D. (A) Food consumption from  $t = 0$  to 4 weeks on diets. Mice were group-housed prior to mating, so genotype cannot be evaluated.  $n = 14$ -17 cages/group, One-way ANOVA, Tukey post-hoc. (B) Food consumption during gestation from E0.5 to E10.5.  $n = 17$ -23 mice per group, 2-way ANOVA, Tukey post-hoc. (C) Weight gain  $t = 0$  to 4 weeks on diets, prior to mating.  $n = 17$ -22 mice per group, 2-way ANOVA, Tukey post-hoc. (D) Weight gain during gestation from E0.5 to E10.5.  $n = 17$ -22 mice per group, linear mixed-effects regression with diet, genotype, and diet-genotype interaction as fixed effects, and number of decidua as a random effect; mvt post-hoc. (E) Maternal body weight at E10.5.  $n = 17$ -23 mice per group, linear mixed-effects regression with diet and genotype as fixed effects, and number of decidua as a random effect; mvt post-hoc. (F) Maternal liver weight at E10.5.  $n = 17$ -23 mice per group, linear mixed-effects regression with diet, genotype, and diet-genotype interaction as fixed effects, and number of decidua and maternal body weight as a random effects; mvt post-hoc. Diet-genotype interactions were included in the regression models shown in panels D-F only if the model with the interaction had the lowest AIC value. There were no significant post-hoc results.

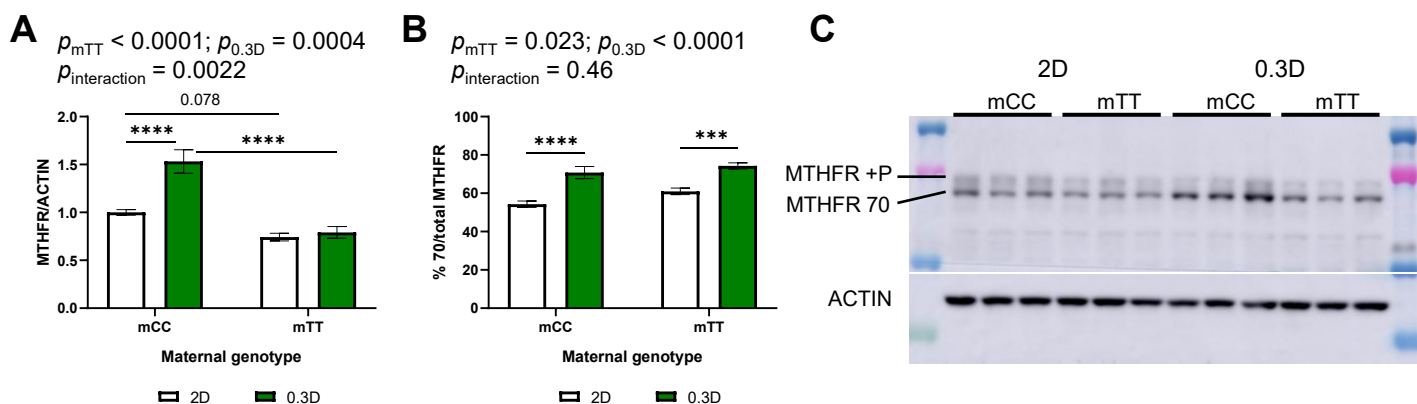

**Figure S3.** Comparison of maternal genotype groups on hepatic MTHFR expression in 2D- and 0.3D-fed mice. (A) MTHFR protein expression. (B) MTHFR isoform expression, as % unphosphorylated MTHFR/total. (C) Representative blot.  $n = 9$ /group, 2-way ANOVA, Tukey post hoc: \*\*\*  $p < 0.001$  \*\*\*\*  $p < 0.0001$ .

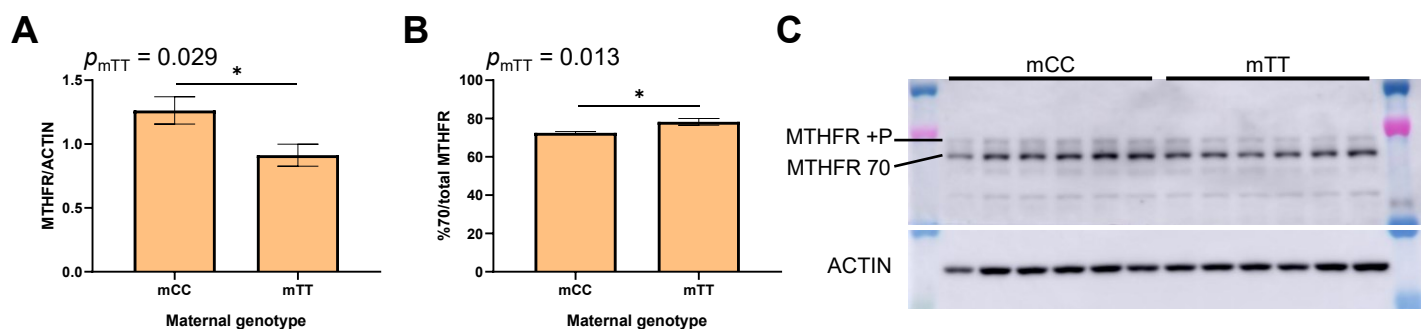

**Figure S4.** Comparison of maternal genotype groups on hepatic MTHFR expression in mice fed 1D. (A) MTHFR protein expression. (B) MTHFR isoform expression, as % unphosphorylated MTHFR/total. (C) Blot.  $n = 6$ /group,  $t$ -test; \*  $p < 0.05$ .
